# Supplementary material
Source: Springer Nature journal article supplement (https://www.springermedizin.de/resource/supplementary/12990_2014_638_MOESM1_ESM.pdf/9612274)

## Audible vocalizations to innocuous stimuli

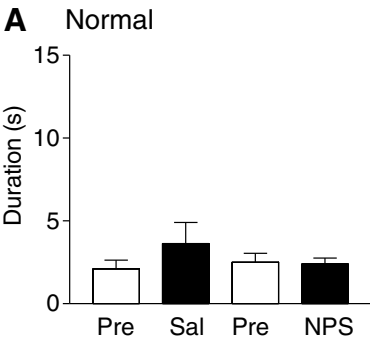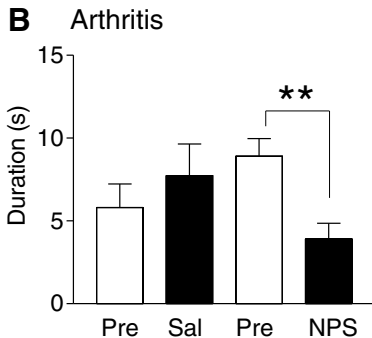

## Audible vocalizations to noxious stimuli

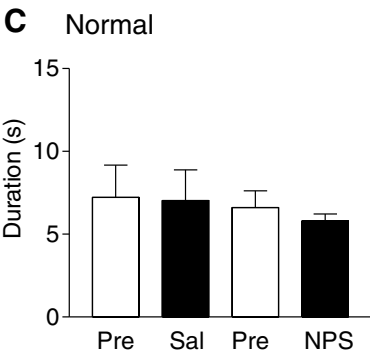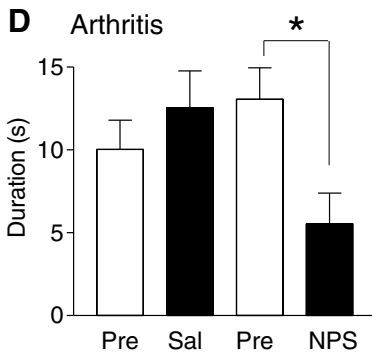

Supplement: MOESM1 [file 9612274]
